# 1 Sustained *Ranavirus* outbreak causes mass-mortality and morbidity 2 in imperiled amphibians.

3  
4 Arik M. Hartmann<sup>1\*</sup>, Max L. Maddox<sup>2</sup>, Robert J. Ossiboff<sup>3</sup>, & Ana V. Longo<sup>1</sup>

5  
6 <sup>1</sup> *Department of Biology, College of Liberal Arts and Sciences, University of Florida, Gainesville, FL 32611*

7 <sup>2</sup> *Department of Wildlife Ecology and Conservation, College of Agriculture and Life Sciences, University of Florida,*  
8 *Gainesville, FL 32611*

9 <sup>3</sup> *Department of Comparative, Diagnostic, and Population Medicine, College of Veterinary Medicine, University of*  
10 *Florida, Gainesville, FL 32610*

11

12 \*Corresponding author e-mail: [arikhartmann@ufl.edu](mailto:arikhartmann@ufl.edu)

13

14 Keywords: salamander, Frog virus 3, gopher frog, striped newt, amphibian mortality, ranavirus

## 15 Abstract

16 A persistent two-month long outbreak of *Ranavirus* in a natural community of amphibians contributed to  
17 a mass die-off of gopher frog tadpoles (*Lithobates capito*) and severe disease in striped newts  
18 (*Notophthalmus perstriatus*) in Florida. Ongoing mortality in *L. capito* and signs in *N. perstriatus*  
19 continued for five weeks after the first observation. Hemorrhagic disease and necrosis were diagnosed  
20 from pathological examination of *L. capito* tadpoles. We confirmed detection of a Frog Virus 3 (FV3)-  
21 like *Ranavirus* via quantitative PCR in all species. Our findings highlight the susceptibility of these  
22 species to *Rv* and the need for long-term disease surveillance during epizootics.

23

## 24 Introduction

25 Emerging wildlife diseases are increasingly associated with amphibian mass mortalities and global  
26 amphibian declines (Rachowicz et al. 2006), and have led to heightened awareness and surveillance of  
27 amphibian pathogens. Iridoviruses in the genus *Ranavirus* (*Rv*) and the amphibian chytrid fungus  
28 *Batrachochytrium dendrobatidis* (*Bd*) are two emerging pathogens that are widely associated with  
29 amphibian mass mortality events (Miller et al. 2011; Fisher and Garner 2020). Outbreaks often result in  
30 high mortality of sensitive life stages or species, while tolerant species and life stages can serve as  
31 pathogen reservoirs (Gray et al. 2009; Schloegel et al. 2010). In the United States (US), pathogen-  
32 mediated mass mortalities and declines have been primarily recorded in larval amphibians in the northern  
33 and western regions of the country (Green et al. 2002). The Southeastern Coastal Plain of the US harbors  
34 the highest diversity of amphibians in North America (Noss et al. 2015), and although *Rv* and *Bd* have  
35 been detected in the region, reports of mortality events and their effects are lacking.

36 We report here the findings of a two-month long outbreak of *Rv* in a natural amphibian community using  
37 pathological examination of moribund tadpoles and confirmed pathogen presence via quantitative PCR

38 (qPCR). We present the first report of *Rv*-induced mass mortality and morbidity in two Coastal Plain  
39 endemic amphibians: the gopher frog (*Lithobates capito*) and the striped newt (*Notophthalmus*  
40 *perstriatus*). Both species have histories of range-wide declines (Jensen and Richter 2005; Farmer et al.  
41 2017), and are listed by the Florida Fish and Wildlife Conservation Commission (FWC) as species of  
42 greatest conservation need (FWC 2019).

43 We first observed mass-mortality of *L. capito* tadpoles on 23 January 2021 at One Shot Pond, in Ordway-  
44 Swisher Biological Station (OSBS), Putnam County, Florida. We observed ongoing die-offs during a  
45 second visit to the pond on 7 March 2021. One Shot Pond is a semi-permanent fishless wetland that  
46 provides important breeding habitat for 16 amphibian species, and is one of few wetlands at OSBS that  
47 supports both *L. capito* and *N. perstriatus* populations (LaClaire 1995; Johnson 2002).

48 During both surveys, we captured amphibians by dipnet or hand and stored them in individual plastic  
49 bags for processing. Each amphibian was examined to confirm species identification and detect gross  
50 symptoms of disease. For pathogen sampling, we swabbed the oral disc and vent of tadpoles following  
51 procedures established by (Gray et al. 2012) and swabbed caudates and post-metamorphic anurans  
52 following standard protocols for amphibian disease sampling (Hyatt et al. 2007). We collected 19 dead  
53 and moribund *L. capito* tadpoles for histopathological analysis and fixed them in 70% ethanol. We  
54 estimated over 500 *L. capito* tadpoles at Gosner stages 28-31 (Gosner 1960) had died between the two  
55 events, and most living tadpoles of the same age class showed symptoms of *Rv* infection, such as edema  
56 and hemorrhage (Fig. 1A-B). We did not observe mortality in *N. perstriatus*, however all newts exhibited  
57 erythema, hemorrhage, or necrosis (Fig. 1C-D). *L. capito* tadpoles at Gosner stages 23-25 (hatchlings)  
58 were abundant and did not show any clinical signs of infection, nor did any southern cricket frogs (*Acris*  
59 *gryllus*) around the pond perimeter.

60 All 19 ethanol-fixed tadpoles were briefly decalcified in 0.5 M ethylenediamine tetraacetate acid (EDTA),  
61 pH 8.0 for ~24 h before sagittal sectioning and routine histopathologic processing and staining.  
62 Microscopic findings included necrosis of the genal glomeruli and interstitium (16/19 tadpoles, Fig. 2A),  
63 spleen (3/19 tadpoles, Fig. 2B), and liver (2/19 tadpoles) with cutaneous and subcutaneous hemorrhage  
64 (4/19 tadpoles) and vascular inflammation (2/19 tadpoles). In a subset of tadpoles (8/19), there were  
65 basophilic to amphophilic, cytoplasmic viral inclusion bodies present in hepatocytes (Fig. 2C). Swab  
66 samples were tested for FV3-like *Rv* and *Bd* using qPCR assays following protocols established by  
67 (Allender et al. 2013) and (Boyle et al. 2004), respectively. We mostly detected severe *Rv* infections in *L.*  
68 *capito* tadpoles, pedomorphic and recently metamorphosed *N. perstriatus*, and low to moderate  
69 infections in adult *A. gryllus* from both sampling events (Fig. 3). Species with disease signs had a higher  
70 proportion of individuals with intense *Rv* infections ( $>10^5+$ ). We detected *Bd* only in 10 *A. gryllus*, nine  
71 of which were also co-infected with *Rv* (Table 1).

72 *Rv* outbreaks can impact amphibian population dynamics by dampening recruitment, and pathogen  
73 persistence in the environment can negate recruitment entirely (Petranka et al. 2007), facilitating the local  
74 extinction of rare species (Earl et al. 2016). To our knowledge, reports of *Rv* outbreaks in natural  
75 populations of *L. capito* have not been published, but experimental infections of *L. capito* resulted in  
76  $>90\%$  mortality of tadpoles (Hoverman et al. 2011). Our observations show similar susceptibility under  
77 natural conditions, providing support for disease-related declines. Ongoing die-offs of tadpoles suggest  
78 that older cohorts may serve as vectors to younger cohorts through viral shedding, direct contact, or  
79 necrophagy (Harp and Petranka 2006; Peace et al. 2019).

80 As a multi-host pathogen of ectotherms, *Rv* outbreaks in amphibians can spread to the wider ectothermic  
81 community (Brenes et al. 2014). Many chelonians are susceptible to *Rv*, including federally protected

82 gopher tortoises (*Gopherus polyphemus*) (Johnson et al. 2008; Cozad et al. 2020), and *Rv* outbreaks in  
83 chelonians have been attributed to pathogen spillover from sympatric amphibians (Brunner et al. 2015). *L.*  
84 *capito* are closely associated with *G. polyphemus* and are one nine amphibians known to cohabitate in  
85 tortoise burrows (Jackson and Milstre 1989). At One Shot Pond there are >10 *G. polyphemus* burrows  
86 within 30 meters of the pond, and we have observed *L. capito* calling from burrow entrances. It is  
87 possible that *Rv* outbreaks can spill over to *G. polyphemus* and other ectothermic commensals by adult *L.*  
88 *capito* moving between ponds and burrows during breeding.

89 In contrast to *L. capito*, natural populations of *N. perstriatus* have not been extensively surveyed for  
90 disease, but *Rv* is a common pathogen of the closely related and sympatric eastern newt (*N. viridescens*)  
91 (Rothermel et al. 2016). *N. perstriatus* have experienced enigmatic declines and extirpations throughout  
92 their range in Florida and Georgia (Farmer et al. 2017), and repatriation efforts have been unsuccessful  
93 (Means et al. 2017). Experimental *Rv* exposure of captive reared *N. perstriatus* resulted in high mortality  
94 of aquatic and recently metamorphosed stages (Means et al. 2016). Our observations suggest that high  
95 pathogen pressure could result in *N. perstriatus* declines, and persistent disease may be inhibiting the  
96 recovery of the species. Our results provide evidence of disease-related risks in populations, a missing  
97 element that can strengthen the petition to list *N. perstriatus* under the Endangered Species Act (USFWS  
98 2011; 2016).

99 In species with complex life histories, densities and life-stages fluctuate seasonally and can result in  
100 recurring epidemics and pathogen persistence through transmission between life stages (Brunner et al.  
101 2004). *N. perstriatus* have complex life history strategies that include facultatively paedomorphic and  
102 triphasic developmental routes, and spend three of five life stages in water (Johnson 2002). These  
103 findings support our ongoing studies where we have found that paedomorphic life stages are more  
104 susceptible to *Rv* and experience higher disease burdens than other life stages (Hartmann et al. in  
105 preparation). We hypothesize that pathogen pressure in aquatic stages is density-dependent. Sustained *Rv*  
106 infections in metamorphosing newts may allow them to act as intraspecific reservoirs when they return to  
107 ponds as adults to breed. Long-term *Rv* persistence may select against the paedomorphic developmental  
108 route in *N. perstriatus*, which would have profound effects on population structure and annual recruitment  
109 as paedomorphic stages undergo accelerated maturation and reproduction (Dodd 1993).

110 Our findings also identify tolerant hosts that may act as reservoirs to more susceptible species (Brunner et  
111 al. 2004). *A. gryllus* are often the most abundant amphibian at ponds within OSBS (personal observation),  
112 occupy a variety of habitats, and can easily disperse between water bodies within OSBS (Dodd 1996).  
113 Because we did not find disease signs in *A. gryllus*, we hypothesize that high tolerance may allow *Rv* to  
114 persist in these hosts. Estimating dispersal rates for this species can help us predict pathogen spread  
115 across habitat types and amphibian assemblages.

116 Despite the diversity of amphibians in Florida and history of recent declines, reports of amphibian die-  
117 offs in the state are rare and few have been published (Landsberg et al. 2013). Although both *Rv* and *Bd*  
118 have been detected, prior reports of mass mortality events in Florida have been attributed to *Perkinsea*  
119 parasites (Isidoro-Ayza et al. 2017). Here we provide the first report of a mass mortality event attributed  
120 to *Rv* in *L. capito*. The confirmation of *Rv* infection, resulting disease, and mass mortality pose major  
121 concerns for Florida's amphibian and reptile populations, particularly specialist species with limited  
122 ranges. Both *L. capito* and *N. perstriatus* are habitat specialists in Florida threatened by habitat loss (Enge  
123 et al. 2014), and it is in the interest of state and federal wildlife agencies to further explore the  
124 implications that emerging pathogens have on management strategies. Future work must consider the role  
125 of emerging pathogens in past and continued amphibian declines. Current conservation plans must  
126 include pathogen mitigation strategies to ensure population survival and success of repatriation programs.

127 Acknowledgements

128 We thank B. Folt (USGS) and L. Brendel (UF) for helping with sample collection, and the staff of the  
129 Histology Laboratory at University of Florida's College of Veterinary Medicine for slide preparation. We  
130 also thank Andy Rappe and the staff at the Ordway-Swisher Biological Station for facilitating this work.  
131 Sampling was carried out under the permission of the Florida Fish and Wildlife Conservation  
132 Commission (FWC-LSSC-17-00031B) and the University of Florida's Institutional Animal Care and Use  
133 Committee (#201810502). We thank members of the Longo Lab and S. Cassidy for their feedback on  
134 previous drafts of this manuscript.

135 References

- 136 Allender MC, Bunick D, Mitchell MA (2013) Development and validation of TaqMan quantitative PCR  
137 for detection of frog virus 3-like virus in eastern box turtles (*Terrapene carolina carolina*).  
138 *Journal of Virological Methods* 188:121–125. <https://doi.org/10.1016/j.jviromet.2012.12.012>
- 139 Boyle D, Boyle D, Olsen V, Morgan J, Hyatt A (2004) Rapid quantitative detection of chytridiomycosis  
140 (*Batrachochytrium dendrobatidis*) in amphibian samples using real-time Taqman PCR assay.  
141 *Diseases of Aquatic Organisms* 60:141–148. <https://doi.org/10.3354/dao060141>
- 142 Brenes R, Gray MJ, Waltzek TB, Wilkes RP, Miller DL (2014) Transmission of ranavirus between  
143 ectothermic vertebrate hosts. *PLoS ONE* 9:e92476. <https://doi.org/10.1371/journal.pone.0092476>
- 144 Brunner JL, Schock DM, Davidson EW, Collins JP (2004) Intraspecific reservoirs: complex life history  
145 and the persistence of a lethal ranavirus. *Ecology* 85:560–566. <https://doi.org/10.1890/02-0374>
- 146 Brunner JL, Storfer A, Gray MJ, Hoverman JT (2015) Ranavirus Ecology and Evolution: From  
147 Epidemiology to Extinction. In: *Ranaviruses*. Springer, Cham, pp 71–104
- 148 Cozad RA, Norton TM, Aresco MJ, Allender MC, Hernandez SM (2020) Pathogen surveillance and  
149 detection of ranavirus (frog virus 3) in translocated gopher tortoises (*Gopherus polyphemus*).  
150 *Journal of Wildlife Diseases* 56:679. <https://doi.org/10.7589/2019-02-053>
- 151 Dodd CK (1993) Cost of living in an unpredictable environment: the ecology of striped newts  
152 *Notophthalmus perstriatus* during a prolonged drought. *Copeia* 1993:605.  
153 <https://doi.org/10.2307/1447221>
- 154 Dodd CK (1996) Use of terrestrial habitats by amphibians in the sandhill uplands of north-central Florida.  
155 *Alytes* 14:42–52
- 156 Earl JE, Chaney JC, Sutton WB, Lillard CE, Kouba AJ, Langhorne C, Krebs J, Wilkes RP, Hill RD,  
157 Miller DL, Gray MJ (2016) Ranavirus could facilitate local extinction of rare amphibian species.  
158 *Oecologia* 182:611–623. <https://doi.org/10.1007/s00442-016-3682-6>
- 159 Enge KM, Farmer AL, Mays JD, Castellón TD, Hill PE, Moler PE (2014) Survey of winter-breeding  
160 amphibian species. Florida Fish and Wildlife Conservation Commission, Fish and Wildlife  
161 Research Institute, Lovett E. Williams, Jr. Wildlife Research Laboratory, Gainesville, Florida,  
162 USA
- 163 Farmer AL, Enge KM, Jensen JB, Stevenson DJ, Smith LL (2017) A range-wide assessment of the status  
164 and distribution of the striped newt (*Notophthalmus perstriatus*). *Herpetological Conservation*  
165 and Biology 12:585–598

- 166 Fisher MC, Garner TWJ (2020) Chytrid fungi and global amphibian declines. *Nature Review*  
167 *Microbiology* 18:332–343. <https://doi.org/10.1038/s41579-020-0335-x>
- 168 Gosner KL (1960) A simplified table for staging anuran embryos and larvae with notes on identification.  
169 *Herpetologica* 16:183–190
- 170 Gray M, Miller D, Hoverman J (2009) Ecology and pathology of amphibian ranaviruses. *Diseases of*  
171 *Aquatic Organisms* 87:243–266. <https://doi.org/10.3354/dao02138>
- 172 Gray M, Miller D, Hoverman J (2012) Reliability of non-lethal surveillance methods for detecting  
173 ranavirus infection. *Diseases of Aquatic Organisms* 99:1–6. <https://doi.org/10.3354/dao02436>
- 174 Green DE, Converse KA, Schrader AK (2002) Epizootiology of sixty-four amphibian morbidity and  
175 mortality events in the USA, 1996–2001. *Annals of the New York Academy of Sciences*  
176 969:323–339. <https://doi.org/10.1111/j.1749-6632.2002.tb04400.x>
- 177 Harp EM, Petranka JW (2006) Ranavirus in wood frogs (*Rana sylvatica*): potential sources of  
178 transmission within and between ponds. *Journal of Wildlife Diseases* 42:307–318.  
179 <https://doi.org/10.7589/0090-3558-42.2.307>
- 180 Hoverman JT, Gray MJ, Haislip NA, Miller DL (2011) Phylogeny, life history, and ecology contribute to  
181 differences in amphibian susceptibility to ranaviruses. *EcoHealth* 8:301–319.  
182 <https://doi.org/10.1007/s10393-011-0717-7>
- 183 Hyatt A, Boyle D, Olsen V, Boyle D, Berger L, Obendorf D, Dalton A, Kriger K, Hero M, Hines H,  
184 Phillott R, Campbell R, Marantelli G, Gleason F, Colling A (2007) Diagnostic assays and  
185 sampling protocols for the detection of *Batrachochytrium dendrobatidis*. *Diseases of Aquatic*  
186 *Organisms* 73:175–192. <https://doi.org/10.3354/dao073175>
- 187 Isidoro-Ayza M, Lorch JM, Grear DA, Winzeler M, Calhoun DL, Barichivich WJ (2017) Pathogenic  
188 lineage of *Perkinsea* associated with mass mortality of frogs across the United States. *Scientific*  
189 *Reports* 7:10288. <https://doi.org/10.1038/s41598-017-10456-1>
- 190 Jackson DR, Milstrey EG (1989) The fauna of gopher tortoise burrows. Florida Game and Fresh Water  
191 Fish Commission Nongame Wildlife Program, Gopher tortoise relocation symposium  
192 proceedings
- 193 Jensen JB, Richter SC (2005) *Rana capito*, Gopher Frogs. In: *Amphibian Declines: The Conservation*  
194 *Status of United States Species*. University of California Press, Berkeley, California, pp 536–538
- 195 Johnson AJ, Pessier AP, Wellehan JFX, Childress A, Norton TM, Stedman NL, Bloom DC, Belzer W,  
196 Titus VR, Wagner R, Brooks JW, Spratt J, Jacobson ER (2008) Ranavirus infection of free-  
197 ranging and captive box turtles and tortoises in the United States. *Journal of Wildlife Diseases*  
198 44:851–863. <https://doi.org/10.7589/0090-3558-44.4.851>
- 199 Johnson SA (2002) Life history of the striped newt at a north-central Florida breeding pond. *Southeastern*  
200 *Naturalist* 1:381–402. [https://doi.org/10.1656/1528-7092\(2002\)001\[0381:LHOTSJ\]2.0.CO;2](https://doi.org/10.1656/1528-7092(2002)001[0381:LHOTSJ]2.0.CO;2)
- 201 LaClaire LV (1995) Vegetation of selected upland temporary ponds in north and north-central Florida.  
202 *Bulletin of the Florida Museum of Natural History* 38:69–96

- 203 Landsberg J, Kiryu Y, Tabuchi M, Waltzek T, Enge K, Reintjes-Tolen S, Preston A, Pessier A (2013) Co-  
204 infection by alveolate parasites and frog virus 3-like ranavirus during an amphibian larval  
205 mortality event in Florida, USA. *Diseases of Aquatic Organisms* 105:89–99.  
206 <https://doi.org/10.3354/dao02625>
- 207 Means RC, Means RPM, Beshel M, Mendyk R, Hill P, Hoffman M, Reichling S, Summerford B (2017)  
208 A Conservation Strategy for the Imperiled Western Striped Newt in the Apalachicola National  
209 Forest, FL
- 210 Means RC, Means RPM, Beshel M, Mendyk R, Hill P, Summerford B, Elkert A, Gray MJ, Miller DL  
211 (2016) A Conservation Strategy for the Imperiled Western Striped Newt in the Apalachicola  
212 National Forest, FL
- 213 Miller D, Gray M, Storfer A (2011) Ecopathology of ranaviruses infecting amphibians. *Viruses* 3:2351–  
214 2373. <https://doi.org/10.3390/v3112351>
- 215 Noss RF, Platt WJ, Sorrie BA, Weakley AS, Means DB, Costanza J, Peet RK (2015) How global  
216 biodiversity hotspots may go unrecognized: lessons from the North American Coastal Plain.  
217 *Diversity and Distributions* 21:236–244. <https://doi.org/10.1111/ddi.12278>
- 218 Peace A, O'Regan SM, Spatz JA, Reilly PN, Hill RD, Carter ED, Wilkes RP, Waltzek TB, Miller DL,  
219 Gray MJ (2019) A highly invasive chimeric ranavirus can decimate tadpole populations rapidly  
220 through multiple transmission pathways. *Ecological Modelling* 410:108777.  
221 <https://doi.org/10.1016/j.ecolmodel.2019.108777>
- 222 Petranka JW, Harp EM, Holbrook CT, Hamel JA (2007) Long-term persistence of amphibian populations  
223 in a restored wetland complex. *Biological Conservation* 138:371–380.  
224 <https://doi.org/10.1016/j.biocon.2007.05.002>
- 225 Rachowicz LJ, Knapp RA, Morgan JAT, Stice MJ, Vredenburg VT, Parker JM, Briggs CJ (2006)  
226 Emerging infectious disease as a proximate cause of amphibian mass mortality. *Ecology*  
227 87:1671–1683. [https://doi.org/10.1890/0012-9658\(2006\)87\[1671:EIDAAP\]2.0.CO;2](https://doi.org/10.1890/0012-9658(2006)87[1671:EIDAAP]2.0.CO;2)
- 228 Rothermel BB, Miller DL, Travis ER, McGuire JLG, Jensen JB, Yabsley MJ (2016) Disease dynamics of  
229 red-spotted newts and their anuran prey in a montane pond community. *Diseases of Aquatic*  
230 *Organisms* 118:113–127. <https://doi.org/10.3354/dao02965>
- 231 Schloegel LM, Ferreira CM, James TY, Hipolito M, Longcore JE, Hyatt AD, Yabsley M, Martins  
232 AMCRPF, Mazzoni R, Davies AJ, Daszak P (2010) The North American bullfrog as a reservoir  
233 for the spread of *Batrachochytrium dendrobatidis* in Brazil: The North American bullfrog as a  
234 reservoir for the spread of an amphibian pathogen. *Animal Conservation* 13:53–61.  
235 <https://doi.org/10.1111/j.1469-1795.2009.00307.x>
- 236 U.S. Fish and Wildlife Service (USFWS) (2011) Endangered and threatened wildlife and plants; 12-  
237 month finding on a petition to list the Striped Newt as threatened
- 238 U.S. Fish and Wildlife Service (USFWS) (2016) Endangered and threatened wildlife and plants; review  
239 of native species that are candidates for listing as endangered or threatened; annual notice of  
240 findings on resubmitted petitions; annual description of progress on listing actions
- 241 (2019) Florida State Wildlife Action Plan. Florida Fish and Wildlife Conservation Commission

242 Figure 1. Gross symptoms of disease in *Ranavirus*-infected amphibians at One Shot Pond. (A-B)  
243 Moribund gopher frog (*Lithobates capito*) tadpoles showing hemorrhages (arrows) and discoloration  
244 (triangles). (C-D) Paedomorphic striped newts (*Notophthalmus perstriatus*) showing hemorrhage and  
245 necrosis (arrows), and erythema (triangle) of the mouth.

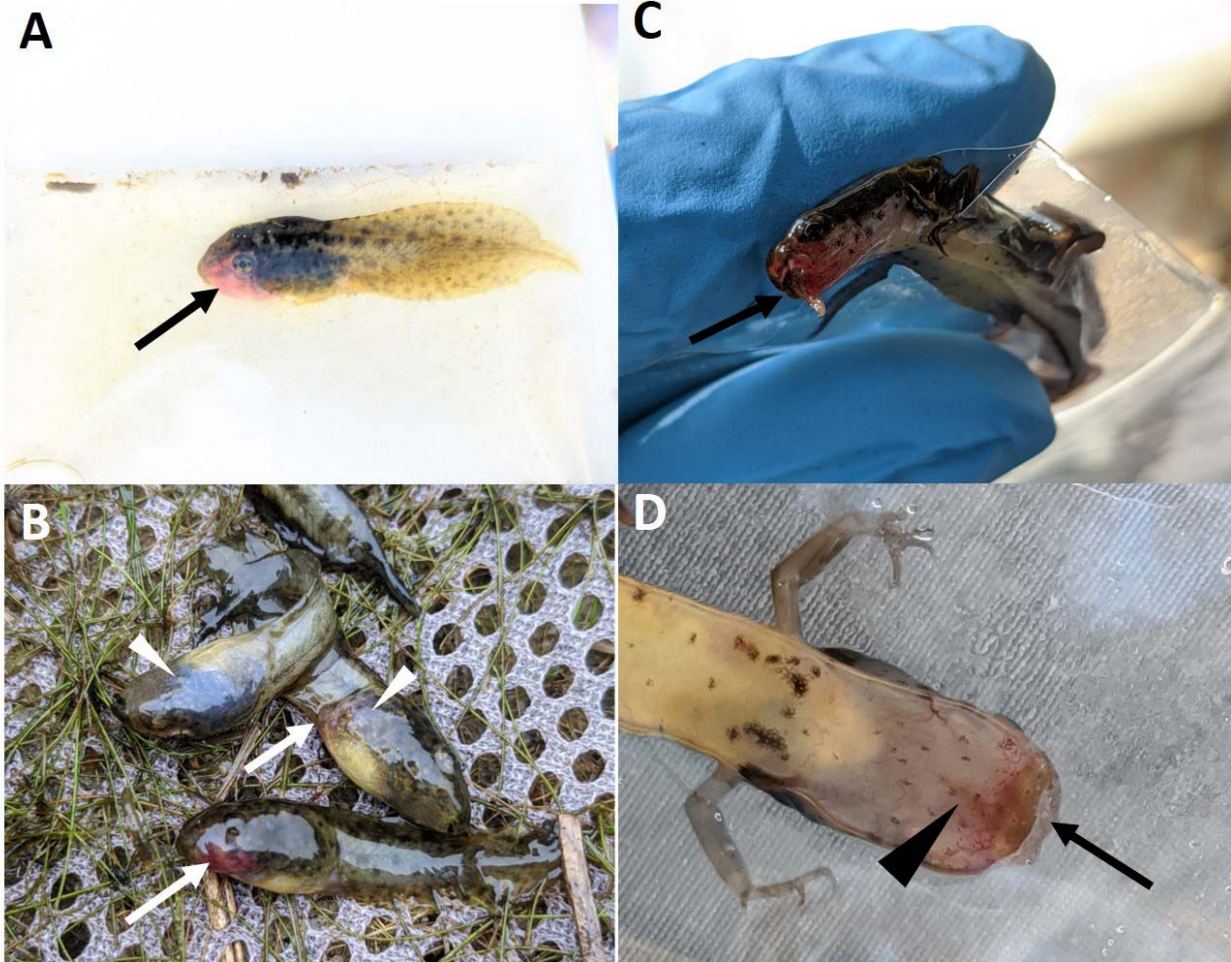

246

247

248

249

250

251

252

253

254

255

256 Figure 2. Histologic evidence of *Ranavirus* infection in gopher frogs (*Lithobates capito*). (A) Renal  
257 glomerular necrosis [Bar = 50 microns]. (B) Splenic necrosis [Bar = 50 microns]. (C) Cytoplasmic  
258 ranaviral inclusions highlighted by black arrows [Bar = 20 microns].

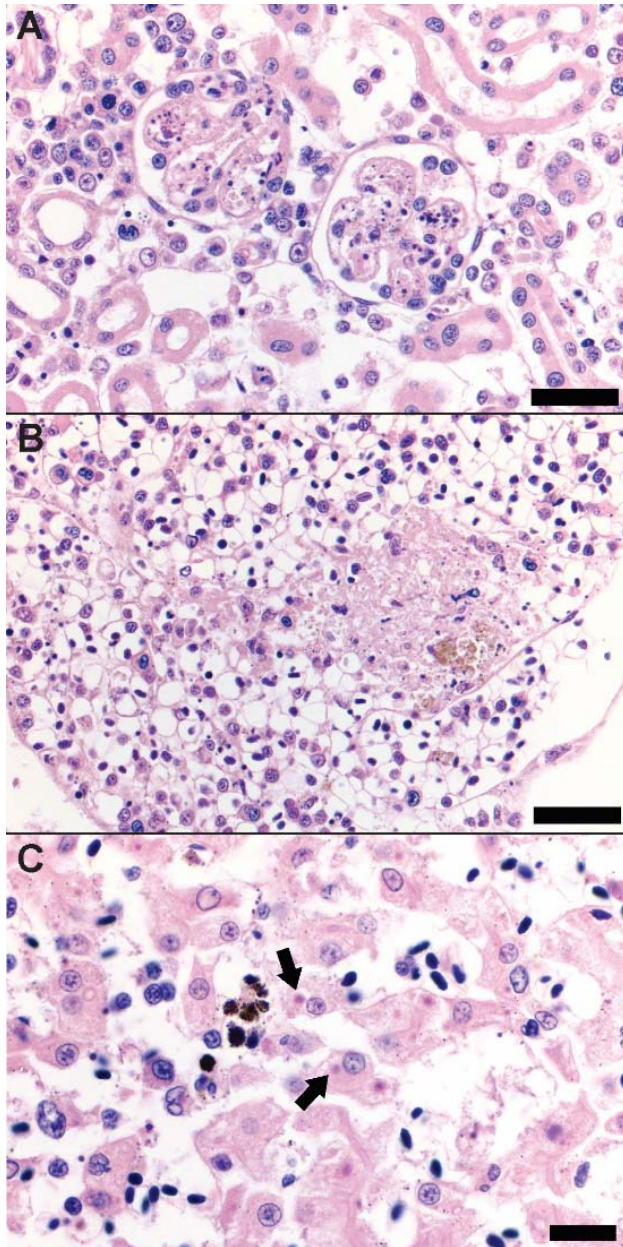

259  
260  
261  
262  
263  
264  
265



266 Figure 3. Prevalence and intensity of *Ranavirus* infections in three amphibian species during two  
 267 sampling events at One Shot Pond at the Ordway-Swisher Biological Station.

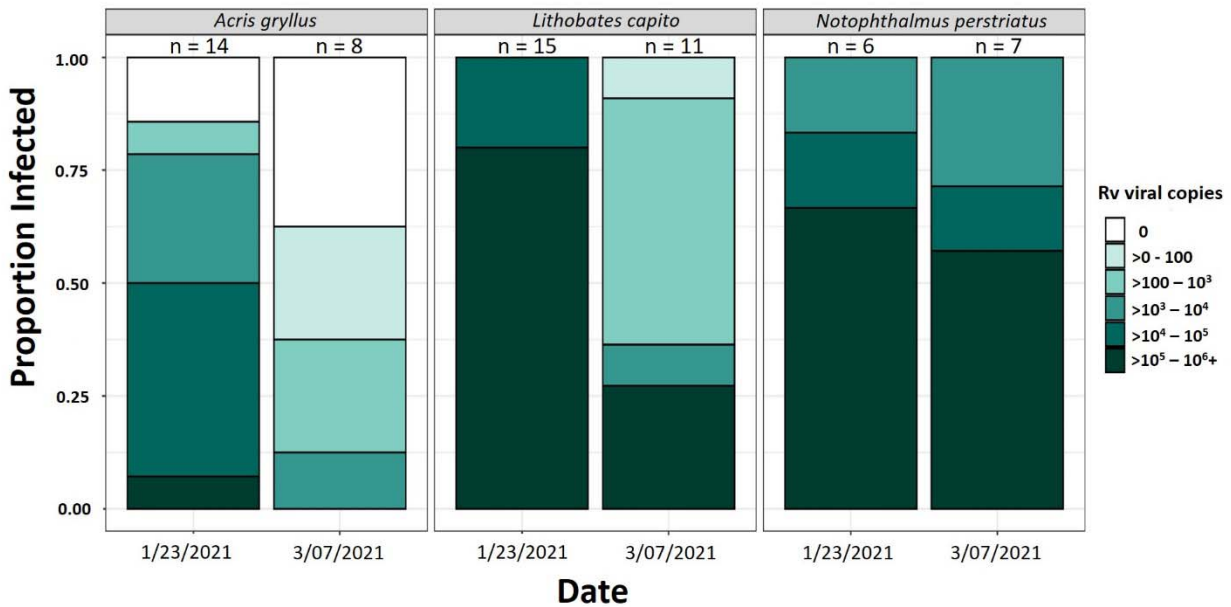

268

269

Table 1. Species, life stage (A = adult, L = larva, P = paedomorph, MP = metamorphosing paedomorph) and prevalence of infection by *Rv* and *Bd* and the average *Rv* intensity combined from the two sampling events.

| Species                          | Life Stages Detected | Number sampled | <i>Rv</i> + (Prev.)  | <i>Bd</i> + (Prev.)  | <i>Bd</i> +/ <i>Rv</i> + (Prev.) | Avg. <i>Rv</i> intensity (viral copies) |
|----------------------------------|----------------------|----------------|----------------------|----------------------|----------------------------------|-----------------------------------------|
| <i>Acris gryllus</i>             | A                    | 22             | 17 (77.2%)           | 10 (45.5%)           | 9 (40.9%)                        | 844.15                                  |
| <i>Lithobates capito</i>         | L                    | 26             | 26 (100%)            | 0 (0%)               | 0 (0%)                           | 2.3 x 10 <sup>6</sup>                   |
| <i>Notophthalmus perstriatus</i> | P, MP                | 13             | 13 (100%)            | 0 (0%)               | 0 (0%)                           | 1.2 x 10 <sup>6</sup>                   |
| <b>Total</b>                     |                      | <b>61</b>      | <b>54/61 (88.5%)</b> | <b>10/61 (16.4%)</b> | <b>9/61 (14.8%)</b>              | <b>1.3 x 10<sup>6</sup></b>             |

270

271

272

273
